# Supplementary material for: Anti-nociceptive effect of Faecalibacterium prausnitzii in non-inflammatory IBS-like models
Source: PubMed Central journal article supplement (PMC4726104; doi:10.1038/srep19399), 2016-01-18
Supplement: srep19399-s1.pdf [file srep19399-s1.pdf]

## Anti-nociceptive effect of *Faecalibacterium prausnitzii* in non-inflammatory IBS-like models

S. Miquel<sup>1,2,3¥,4¥#\*</sup>, R. Martín<sup>1,2#</sup>, A. Lashermes<sup>5,6</sup>, M. Gillet<sup>7</sup>, M. Meleine<sup>5,6</sup>, A. Gelot<sup>5,6</sup>, A. Eschalier<sup>5,6</sup>, D. Ardid<sup>5,6</sup>, L. G. Bermúdez-Humarán<sup>1,2</sup>, H. Sokol<sup>1,2,8,9,10,11</sup>, M. Thomas<sup>1,2</sup>, V. Theodorou<sup>7</sup>, P. Langella<sup>1,2§</sup>, F. A. Carvalho<sup>5,6, \$,\*</sup>

### SUPPLEMENTARY INFORMATIONS

**Supplemental Table 1:** Intestinal health parameters. Non-handled control mice (NH-PBS) and (NH-LYBHI), Neonatal Maternal Separation control mice (NMS-PBS) and (NMS-LYBHI), Non-handled *F. prausnitzii* (NH- A2-165) or supernatant (NH- SN) treated mice, NMS *F. prausnitzii* (NMS- A2-165) or supernatant (NMS- SN) treated mice AU: arbitrary units.

|           | Body weight (g) | Spleen weight (mg) | Colon weight (mg) | Colon length (cm) | Ameho score (AU) |
|-----------|-----------------|--------------------|-------------------|-------------------|------------------|
| NH-PBS    | 22.8+/-0.3      | 64.7+/-3.5         | 221.6+/-6.2       | 8.3+/-0.1         | 0                |
| MS-PBS    | 22.4+/-0.4      | 76.7+/-4.7         | 215.4+/-8.5       | 8.1+/-0.2         | 0                |
| NH-A2-165 | 23.2+/-0.5      | 70.0+/-3.4         | 223.1+/-6.6       | 8.3+/-0.3         | 0                |
| MS-A2-165 | 22.2+/-0.4      | 69.0+/-3.1         | 216.4+/-6.0       | 7.8+/-0.2         | 0                |
| NH-LYBHI  | 22.3+/-0.6      | 68.2+/-3.4         | 224.5+/-8.8       | 8.1+/-0.2         | 0                |
| MS-LYBHI  | 22.1+/-0.7      | 74.1+/-3.6         | 213.8+/-7.1       | 8.1+/-0.2         | 0                |
| NH-SN     | 22.0+/-0.5      | 71.6+/-3.8         | 214.7+/-7.6       | 7.7+/-0.2         | 0                |
| MS-SN     | 21.9+/-0.4      | 79.9+/-6.0         | 212.1+/-4.4       | 7.9+/-0.3         | 0                |

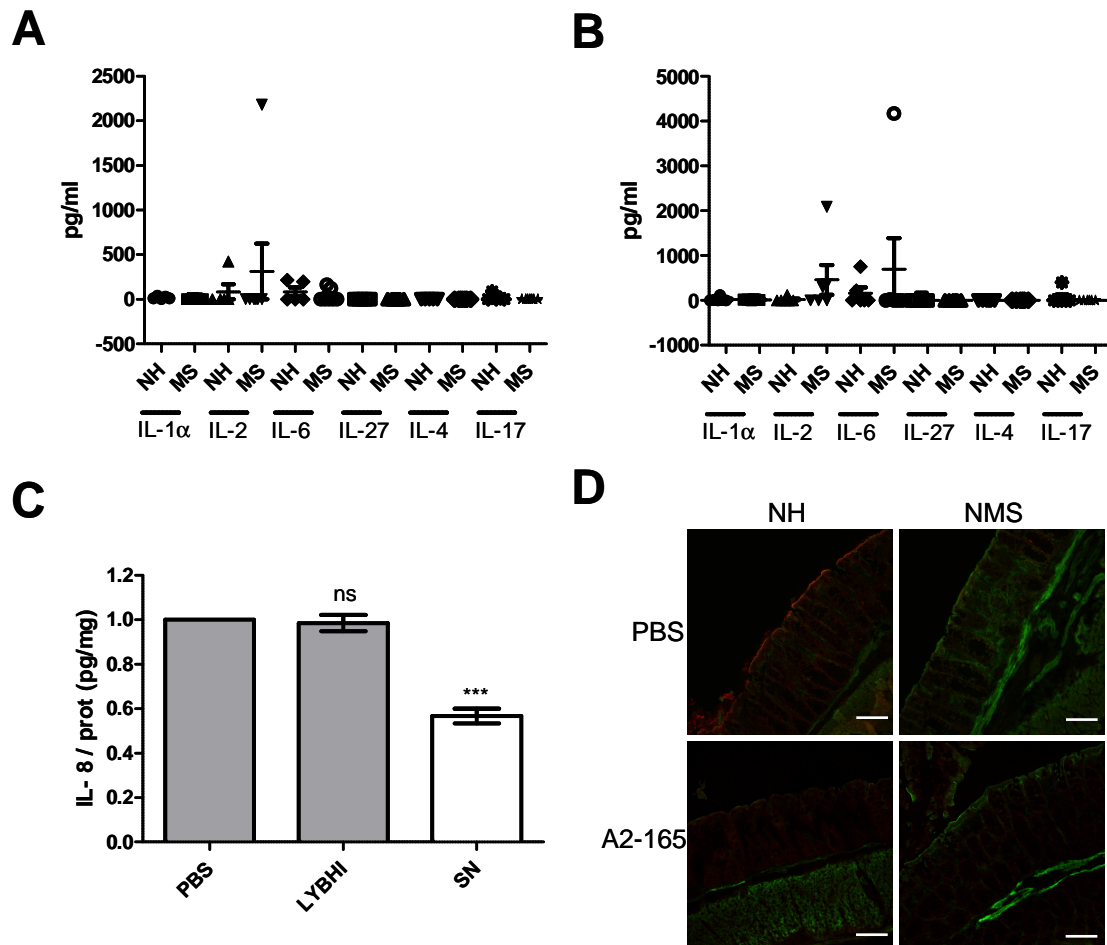

**Figure S1:** Quantification of plasma cytokine levels in NH mice compared to NMS mice in (A) control group (PBS) and (B) *F. prausnitzii* treated. (C) Immuno-modulation capacities of *F. prausnitzii* A2-165 supernatant (SN) *in vitro*. IL-8 production in HT-29 TNF- $\alpha$  stimulated cells. Experiments have been done at least in triplicate. Results are expressed as IL-8/ quantity of protein (pg/mg) and have been normalized using as reference value the IL-8 produced after the co-incubation with PBS as a negative control. (D) Sections of the distal colon were stained for Occludin (red) and Phalloidin (green) expression. Original magnification X200 (bare scale represents 100 $\mu$ m). Representative images from each group. \*\*\*  $P < 0.001$ .
